# Supplementary material for: Chemical Profiling and Screening of the Marker Components in the Fruit of Cassia fistula by HPLC and UHPLC/LTQ-Orbitrap MSn with Chemometrics
Source: PubMed Central journal article supplement (PMC6100387; doi:10.3390/molecules23071501), 2018-06-21
Supplement: molecules-23-01501-s001.pdf [file molecules-23-01501-s001.pdf]

# Chemical Profiling and Screening of the Marker Components in the Fruit of *Cassia fistula* by HPLC and UHPLC/LTQ-Orbitrap MS<sup>n</sup> with Chemometrics

## Supplementary Materials

**Table 1.** The peak area of the fifteen common peaks.

| Peak | RT(min) | S1     | S2     | S3     | S4     | S5     | S6     | S7     | S8     | S9     | S10    | S11    | S12    | R      |
|------|---------|--------|--------|--------|--------|--------|--------|--------|--------|--------|--------|--------|--------|--------|
| 1    | 4.35    | 149828 | 61927  | 115555 | 68219  | 75086  | 70961  | 73517  | 57580  | 64750  | 36023  | 46053  | 58539  | 73170  |
| 2    | 10.39   | 61513  | 178430 | 77870  | 211018 | 414681 | 131677 | 218175 | 226552 | 234782 | 227217 | 336120 | 347247 | 222107 |
| 3    | 14.34   | 26250  | 44441  | 83924  | 83337  | 132366 | 25886  | 111181 | 148898 | 73208  | 143826 | 31955  | 60176  | 80454  |
| 4    | 17.34   | 67390  | 44398  | 78938  | 65913  | 91725  | 36779  | 52787  | 59534  | 61020  | 32390  | 67185  | 54586  | 59387  |
| 5    | 28.43   | 63350  | 42650  | 18395  | 44666  | 189914 | 96711  | 81641  | 115523 | 117787 | 112588 | 47657  | 70730  | 83468  |
| 6    | 34.54   | 118262 | 37366  | 206434 | 54658  | 65838  | 172294 | 87563  | 441440 | 69636  | 303503 | 32051  | 55738  | 137065 |
| 7    | 39.99   | 46001  | 35773  | 63349  | 32611  | 63566  | 47117  | 64472  | 83602  | 60871  | 34384  | 55069  | 49742  | 53046  |
| 8    | 44.76   | 110470 | 53140  | 325709 | 75495  | 93637  | 147536 | 88450  | 463469 | 87996  | 504153 | 80878  | 98171  | 177426 |
| 9    | 52.01   | 19018  | 6030   | 119918 | 20207  | 15519  | 36438  | 41222  | 166328 | 17484  | 182485 | 21461  | 27566  | 56140  |
| 10   | 53.38   | 304826 | 147249 | 6811   | 25158  | 19175  | 385397 | 51880  | 446572 | 34912  | 293075 | 21938  | 42356  | 148279 |
| 11   | 68.63   | 64681  | 58285  | 49559  | 79391  | 206286 | 80046  | 85340  | 161137 | 103674 | 100299 | 63856  | 81708  | 94522  |
| 12   | 76.19   | 54206  | 72906  | 20461  | 84347  | 86525  | 76240  | 188376 | 138778 | 86051  | 118331 | 91265  | 94308  | 92649  |
| 13   | 88.87   | 111588 | 111461 | 251535 | 165941 | 229190 | 147709 | 298503 | 386549 | 232463 | 333435 | 121936 | 182831 | 214429 |
| 14   | 94.20   | 18994  | 27285  | 90762  | 62671  | 74895  | 32124  | 217538 | 146779 | 72137  | 132509 | 44007  | 67592  | 82275  |
| 15   | 111.58  | 15428  | 23115  | 14714  | 16697  | 15355  | 12713  | 13526  | 14868  | 11839  | 13505  | 15880  | 9896   | 14795  |

yangpin #4505 RT: 31.84 AV: 1 NL: 6.04E2  
T: ITMS - c ESI d Full ms2 1023.24@cid35.00 [270

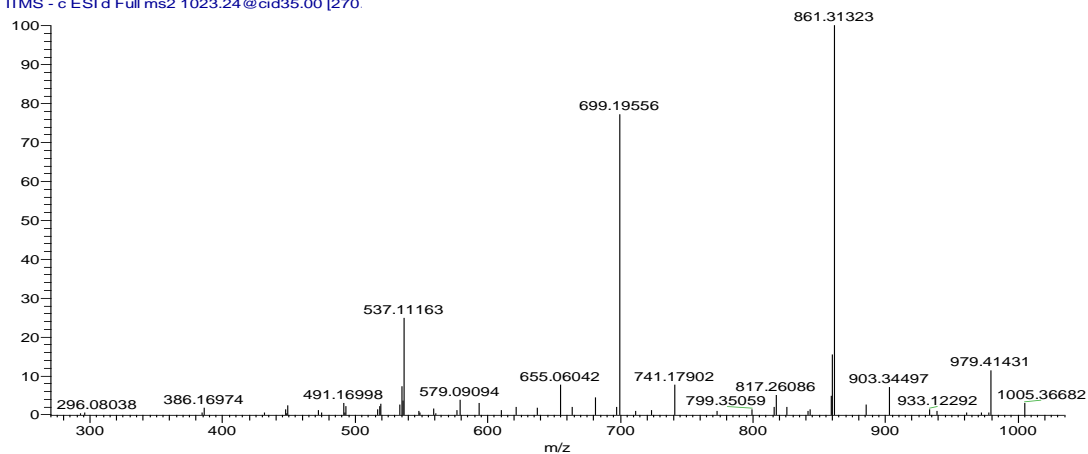

**Figure 1.** The chromatogram of secondary fragment ions about Compound 12.

(sennoside aglycon linked with three molecules of glucose).

yangpin #10488 RT: 74.39 AV: 1 NL: 5.43E2  
T: ITMS - c ESI d Full ms2 699.13@cid35.00 [180.0

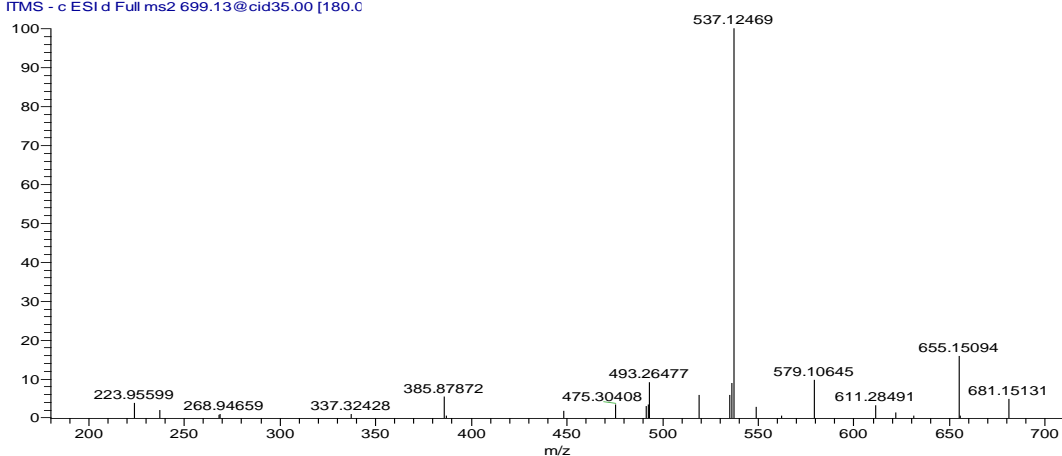

**Figure 2.** The chromatogram of secondary fragment ions about Compound 26.

(sennoside aglycon linked with one molecule of glucose, 9-[2-carboxy-4-hydroxy-10-oxo-5-[(2S,3R,4S,5S,6R)-3,4,5-trihydroxy-6-(hydroxymethyl)oxan-2-yl]oxy-9H-anthracen-9-yl]-4,5-dihydroxy-10-oxo-9H-anthracene-2-carboxylic acid).

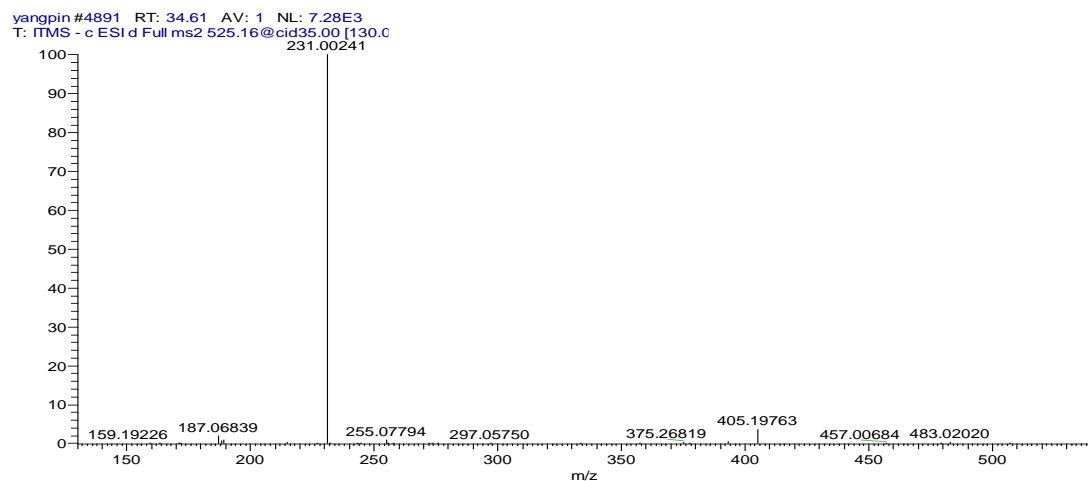

**Figure 3.** The chromatogram of secondary fragment ions about Compound 14.

(1-[1,5-dihydroxy-3-methyl-8-[3,4,5-trihydroxy-6-[(3,4,5-trihydroxyoxan-2-yl)oxymethyl]oxan-2-yl]oxynaphthalen-2-yl]ethanone).

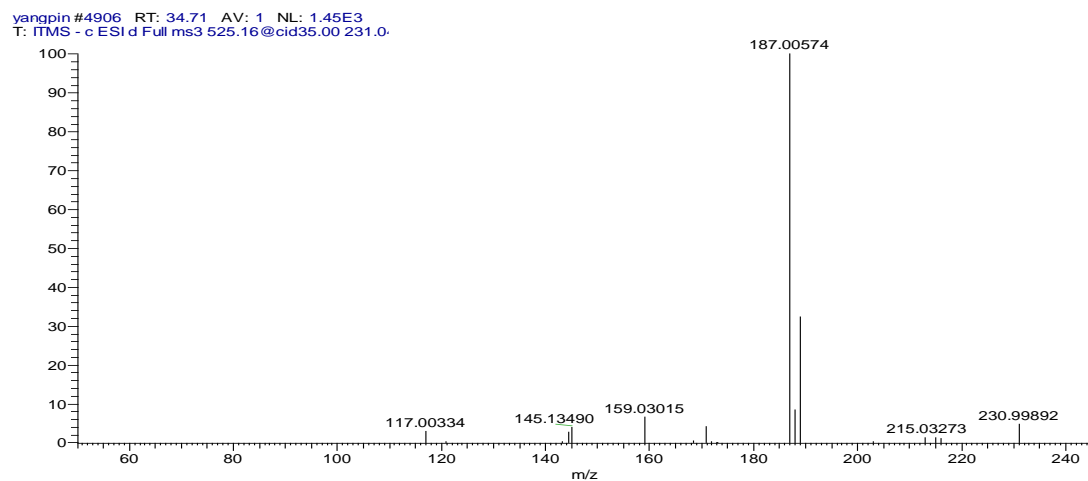

**Figure 4.** The chromatogram of tertiary fragment ions about Compound 14.

(1-[1,5-dihydroxy-3-methyl-8-[3,4,5-trihydroxy-6-[(3,4,5-trihydroxyoxan-2-yl)oxymethyl]oxan-2-yl]oxynaphthalen-2-yl]ethanone).
